# Supplementary material
Source: HighWire-hosted journal article supplement (https://www.life-science-alliance.org/content/6/3/e202201722/F6)

Figure S3A

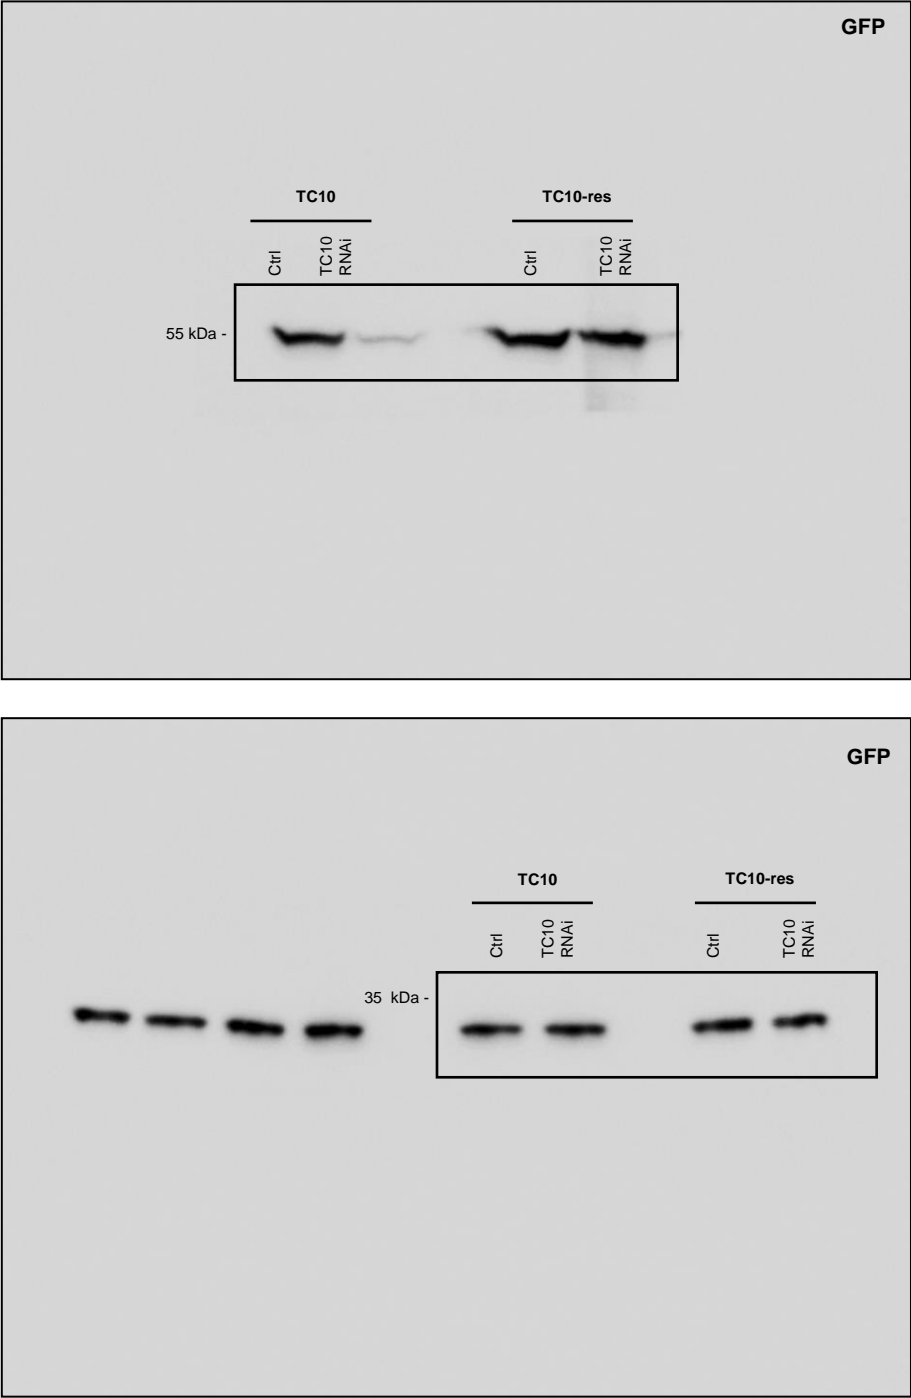

Figure S3E

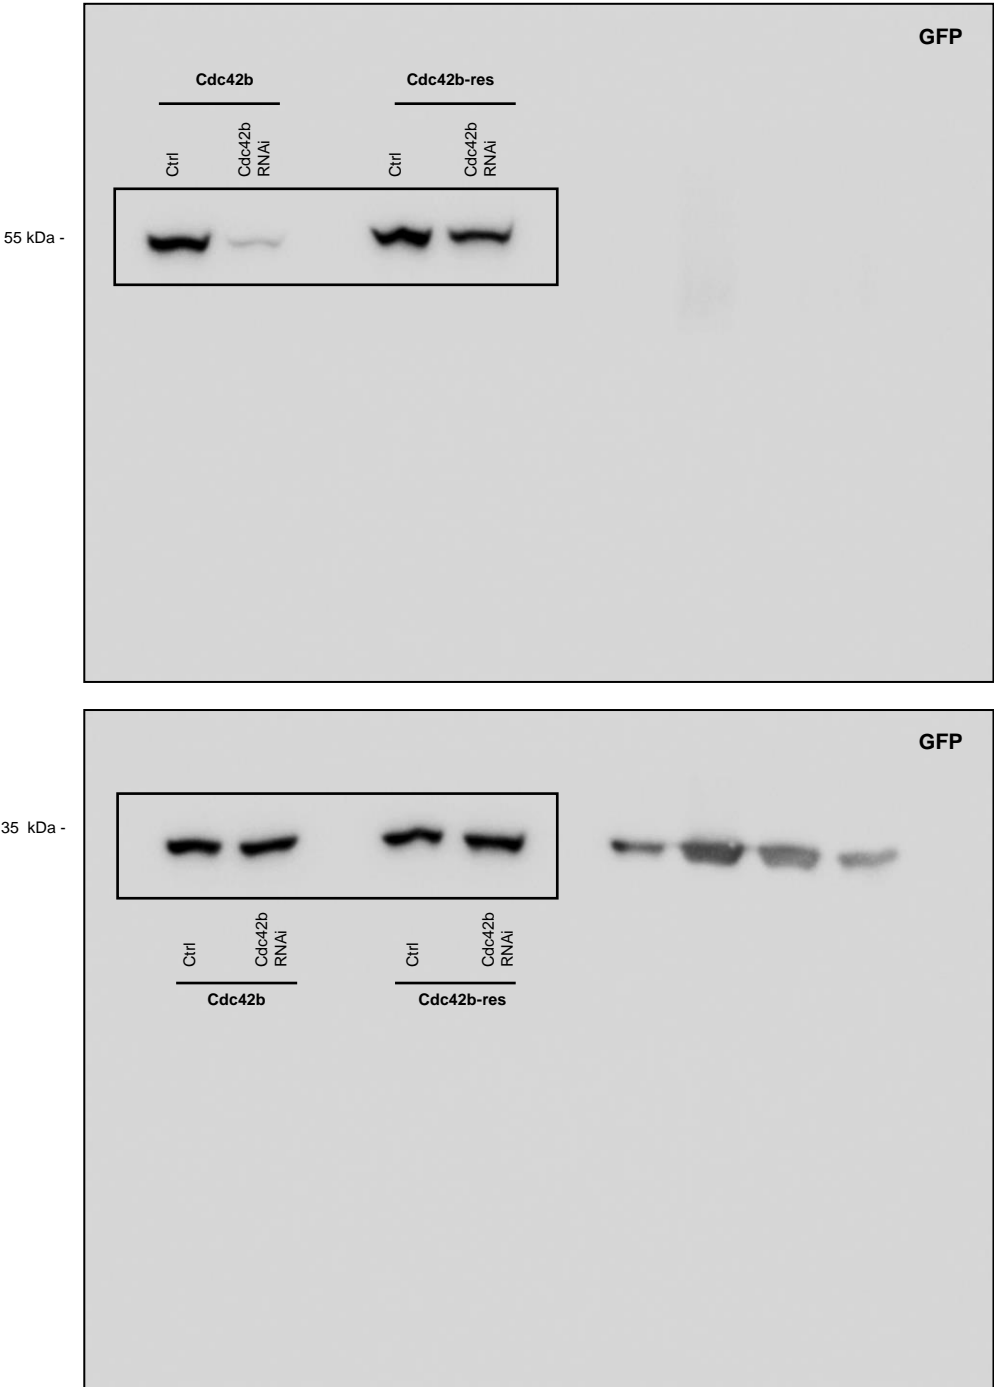

Figure S3G

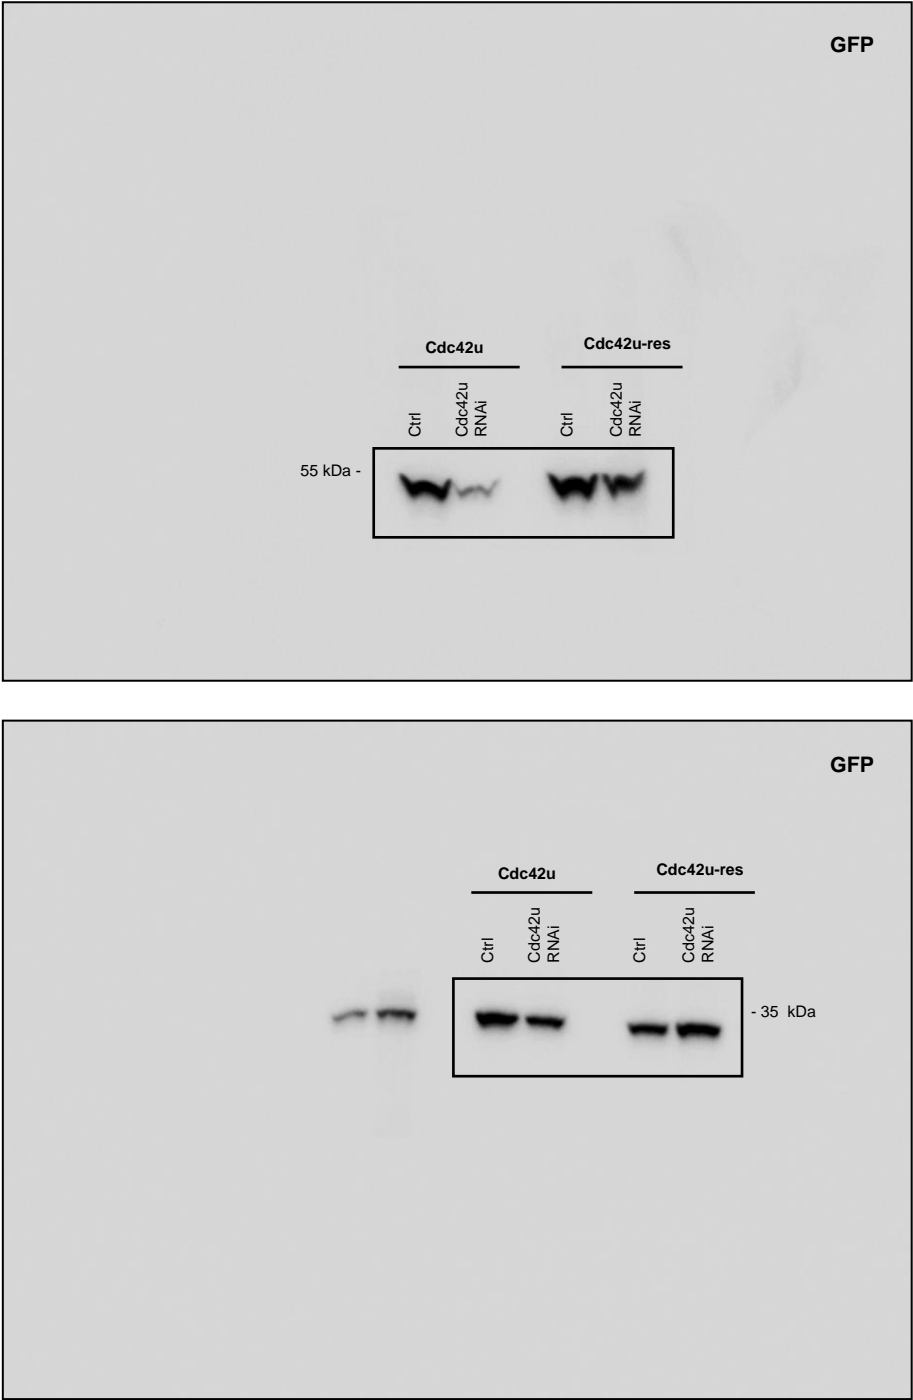

Figure S3I

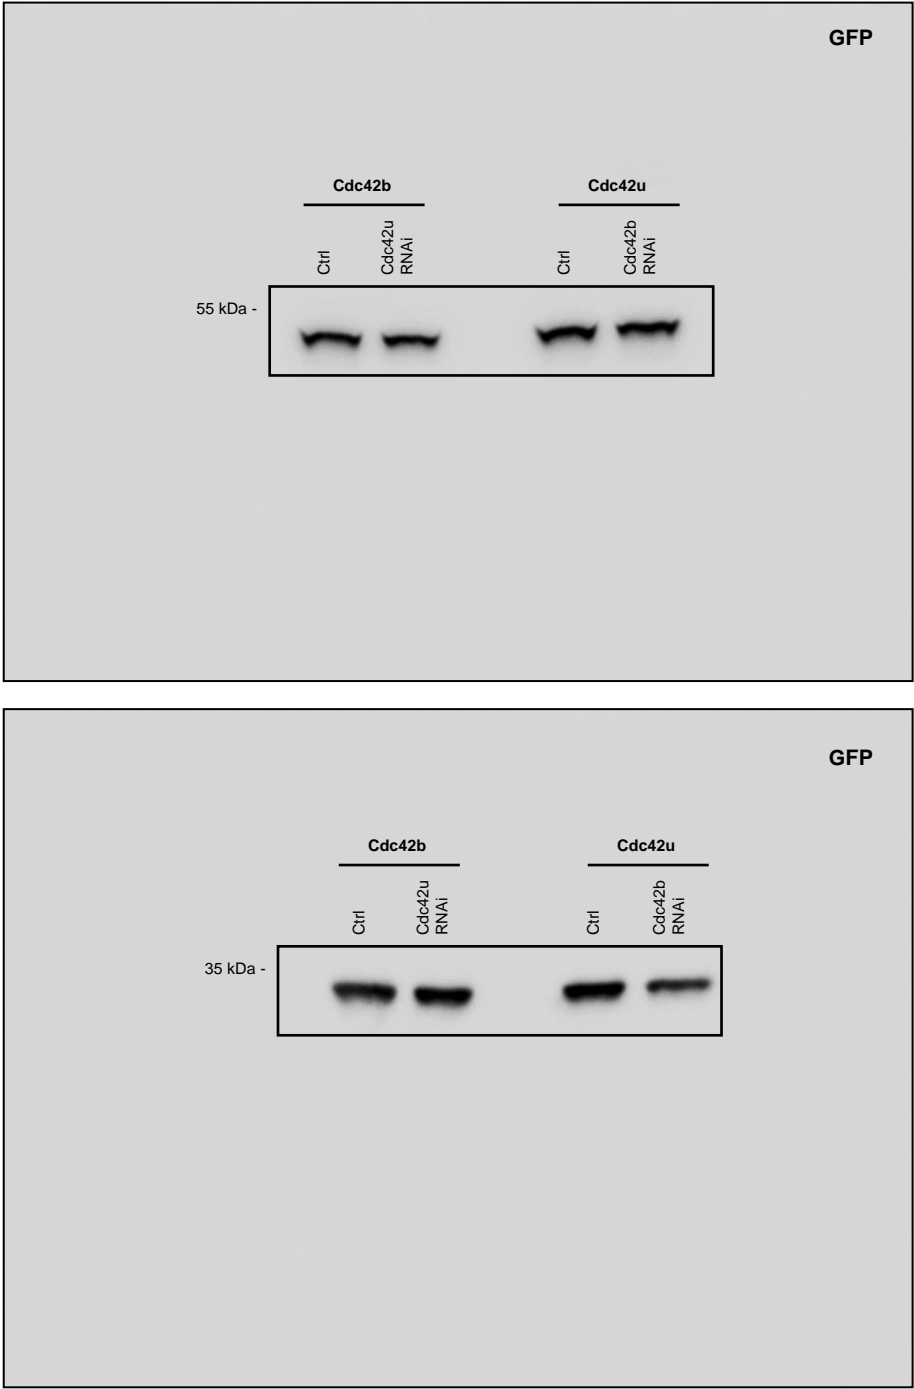

Supplement: inline-supplementary-material-10 [file inline-supplementary-material-10.pdf]
